# Supplementary material for: A nationwide prospective cohort study on return to gainful occupation after stroke in Denmark 1996–2006
Source: PubMed Central journal article supplement — BMJ Open. 2011 Oct 17;1(2):e000180. doi: 10.1136/bmjopen-2011-000180 (PMC3211051; doi:10.1136/bmjopen-2011-000180), 2011-10-17
Supplement: bmjopen-2011-000180.draft_revisions.pdf [file bmjopen-2011-000180.draft_revisions.pdf]

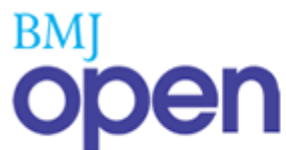

**A nationwide prospective cohort study on return to gainful occupation after stroke in Denmark 1996 – 2006**

|                               |                                                                                                                                                                                                                                                                                                                                                                  |
|-------------------------------|------------------------------------------------------------------------------------------------------------------------------------------------------------------------------------------------------------------------------------------------------------------------------------------------------------------------------------------------------------------|
| Journal:                      | <i>BMJ Open</i>                                                                                                                                                                                                                                                                                                                                                  |
| Manuscript ID:                | bmjopen-2011-000180                                                                                                                                                                                                                                                                                                                                              |
| Article Type:                 | Research                                                                                                                                                                                                                                                                                                                                                         |
| Date Submitted by the Author: | 13-May-2011                                                                                                                                                                                                                                                                                                                                                      |
| Complete List of Authors:     | Hannerz, Harald; National Research Centre for the Working Environment<br>Holbaek Pedersen, Betina; National Research Centre for the Working Environment<br>Poulsen, Otto; National Research Centre for the Working Environment<br>Andersen, Lars; National Research Centre for the Working Environment<br>Frank, Humle; Centre of Rehabilitation of Brain Injury |
| <b>Subject Heading</b>:       | Rehabilitation medicine                                                                                                                                                                                                                                                                                                                                          |
| Keywords:                     | STROKE MEDICINE, REHABILITATION MEDICINE, OCCUPATIONAL & INDUSTRIAL MEDICINE, SOCIAL MEDICINE                                                                                                                                                                                                                                                                    |
|                               |                                                                                                                                                                                                                                                                                                                                                                  |

SCHOLARONE™  
Manuscripts

only

1  
2  
3  
4 **A nationwide prospective cohort study on return to gainful occupation after**  
5  
6  
7 **stroke in Denmark 1996 – 2006**  
8

9  
10 Harald Hannerz<sup>1</sup>, Betina Holbæk Pedersen<sup>1</sup>, Otto M. Poulsen<sup>1</sup>, Frank Humle<sup>2</sup>, Lars L. Andersen<sup>1</sup>  
11

12  
13  
14  
15 1. National Research Centre for the Working Environment, Lersø Parkalle 105, 2100 Copenhagen,  
16  
17 Denmark.  
18

19  
20 2. Centre of Rehabilitation of Brain Injury, Amagerfælledvej 56A, 2300 Copenhagen, Denmark.  
21

22  
23  
24 Corresponding author: Harald Hannerz. E-mail: hha@nrcwe.dk. Phone: +45 39 16 54 60. Fax: +45  
25  
26 39 16 52 01  
27

28  
29  
30  
31  
32  
33 Word count: 3093  
34  
35  
36  
37  
38  
39  
40  
41  
42  
43  
44  
45  
46  
47  
48  
49  
50  
51  
52  
53  
54  
55  
56  
57  
58  
59  
60

## ABSTRACT

**Background:** Return to work is an important outcome factor for working-age post stroke patients. Previous epidemiologic studies on this topic have been small (on average 125 patients per study). Their estimated effects are therefore associated with a tremendous statistical uncertainty. The present study estimates the effect of various predictors on the odds of returning to work after stroke in the total population of 20-57 year-old previously employed hospital treated stroke patients in Denmark 1996 – 2006 (N = 19985).

**Methods and Results:** The patients were followed through national registers; 62% were gainfully occupied two years after stroke. Patients with intracerebral infarction (reference group) had significantly higher chance of returning to work than those with subarachnoid hemorrhage, OR = 0.79 (95% CI: 0.71 – 0.88), and intracerebral hemorrhage, OR = 0.39 (0.35 – 0.43). Unskilled workers (reference group) had a worse prognosis than skilled workers, OR = 1.50 (1.38 – 1.64), technicians and associate professionals, OR = 2.33 (2.05 – 2.65), and professionals, OR = 3.04 (2.70 – 3.43). Being a woman, OR = 0.79 (0.74 – 0.84), self-employed, OR = 0.87 (0.78 – 0.96), or  $\geq 50$  years, OR = 0.61 (0.57 – 0.65), was also associated with a worse prognosis. Patients in municipalities with a brain injury rehabilitation centre did not have a better prognosis than patients in other municipalities, OR = 0.91 (0.78 – 1.06).

**Conclusion:** Further research is needed to explain the gender inequality, which suggests either a potential to improve return-to-work rates among the females or a tendency among the males to return too early.

**KEY WORDS:** cerebral infarct; intracerebral hemorrhage; subarachnoid hemorrhage; rehabilitation; work ability.

1  
2  
3  
4  
5  
6  
7  
8  
9  
10  
11  
12  
13  
14  
15  
16  
17  
18  
19  
20  
21  
22  
23  
24  
25  
26  
27  
28  
29  
30  
31  
32  
33  
34  
35  
36  
37  
38  
39  
40  
41  
42  
43  
44  
45  
46  
47  
48  
49  
50  
51  
52  
53  
54  
55  
56  
57  
58  
59  
60

## ARTICLE SUMMARY

### Article focus

- The present study estimates odds ratios for return to gainful occupation ca. two years after stroke.
- It focuses on clinical, demographic and occupational factors which are potentially useful in predicting return to work.
- The study includes the total population of 20-57 year-old previously employed hospital treated stroke patients in Denmark 1996 – 2006.

### Key messages

- 62% of the studied patients were gainfully occupied during the second calendar year after the stroke.
- The odds of returning to work depend on age, gender, occupation, self-employment and type of stroke.
- Women had a much lower chance of returning to work than men and to our knowledge there are no known physiologic factors which can justify this difference.
- Patients in municipalities with a brain injury rehabilitation centre did not have a better prognosis than patients in other municipalities.

### Strengths and limitations of this study

- The follow-up was done through registers and all people in the target population were included. Hence, the study is free from sampling bias, recall bias and non-response bias.
- The statistical model was completely defined and a detailed study protocol was published before we looked at any relation between the concerned exposure and response variables in our data material. Since we adhered to the protocol, the study is free from hindsight bias.
- The study is further strengthened by its size.
- The major weakness of the study is that it does not contain any stroke severity measures.

## INTRODUCTION

Return to work (RTW) plays a crucial role in the rehabilitation process of working age post-stroke patients. It provides a social identity and it is associated with increased self-esteem and life satisfaction.[1-3] It is also important, from a societal perspective, that as many as possible of the stroke patients who are economically active at the time of the onset, returns to work after stroke; in the European Union, the annual cost of lost productivity due to disability or death as a consequence of stroke was estimated at €8.5 billion in 2008.[4]

A recent review of articles dealing with return to work among stroke patients identified 70 studies, which in total comprised 8810 patients working before the stroke.[5] The review concluded that the analytic strategies that were used were inappropriate in all but three of the 70 studies.[6-8] The rest of the studies were associated either with selection bias or non-interpretable results due to highly variable follow-up periods or ill-defined criteria of work before stroke and at follow-up.[5] There are also limitations associated with the three appropriately performed studies. All of them were small (the included number of patients ranged from 109 to 173) and two of them [6;8] deal with data that are too old to afford results that can be used as proxies for present time RTW probabilities. The most recent of the three studies [7] reported that 55% of previously employed stroke patients in New Zealand returned to paid employment within six months. That study is, however, associated with selection bias; it only included cognitively competent patients.

The present study investigates return to work frequencies among nearly twenty thousand 20 – 57 year-old stroke patients in Denmark who were gainfully occupied prior to the stroke. The study covers stroke that occurred in the time period 1996 – 2006.

## MATERIAL AND METHODS

The study utilizes the Danish Occupational Hospitalization Register (OHR), a database obtained through a record-linkage between three national registers—the central person register, the hospital register, and the employment classification module. Currently, the OHR includes every person who has been economically active and an inhabitant of Denmark sometime after 1980.

The national hospital register has existed since 1977 and contains data from all public hospitals in Denmark (more than 99% of all admissions). From 1977 to 1994, the register only included inpatients but from 1995 it also covers outpatients and emergency ward visits.[9] The diagnoses have been coded according to international classification of diseases version ten (ICD-10) since 1994.

The central person register contains information on gender, addresses and dates of birth, death and migrations for every person who is or has been an inhabitant of Denmark sometime between 1968 and present time. A person's occupation and social status are, since 1975, registered annually in the employment classification module.[9] The occupations are, since 1994, coded in accordance with Statistics Denmark's Standard Classification of Occupations (DISCO-88),[10] which is a national version of the International Standard Classification of Occupations (ISCO-88). Socio-economic status is coded in accordance with Statistics Denmark's official socio-economic classification.[11]

At the one- and two-digit level, the classification contains the following social groups:

1. Gainfully occupied people
  - 1.1. Self-employed people
  - 1.2. Assisting spouses
  - 1.3. Employees
2. People on unemployment benefits

1  
2  
3  
4  
5 3. Not economically active

6  
7 3.1. People in training/education

8  
9 3.2. Pensioners

10  
11 3.3. Other not economically active  
12  
13

14  
15  
16 **Inclusion criteria**

17  
18 A person would be included in the study if he/she

- 19  
20  
21 1. on at least one occasion in the time period 1996 – 2006, was registered in the hospital  
22  
23 patient registry with one of the following ICD-10 codes as principal diagnosis:  
24  
25
- 26 • I60 subarachnoid hemorrhage
  - 27
  - 28 • I61 intracerebral hemorrhage
  - 29
  - 30 • I63 cerebral infarction
  - 31
  - 32 • I64 stroke, not specified as hemorrhage or infarction
  - 33
- 34  
35 2. belonged to the age interval 20 – 57 years at the time of the hospital contact  
36  
37 3. was gainfully occupied the year preceding the hospital contact  
38  
39  
40  
41

42  
43 **Ethical approval**

44  
45 The study has been notified to and registered by Datatilsynet (the Danish Data Protection Agency).

46  
47 According to Danish law, questionnaire and register based studies do not need approval by ethical  
48  
49 and scientific committees, nor informed consent.  
50

51  
52  
53  
54 **Statistical analysis**

55  
56 The study consists of two parts, one is descriptive while the other utilizes statistical inference  
57  
58 techniques to test hypotheses and estimate odds ratios for RTW (return to work).  
59  
60

1  
2  
3  
4  
5  
6  
7 In the descriptive part we followed the stroke patients for five calendar years after the stroke for  
8  
9 their main social status in each of these years. This part of the study only included people who were  
10  
11 less than 55 years at the time of the stroke. For any given patient, the calendar year of the stroke  
12  
13 was defined as year 0, the next calendar year was defined as year 1 etc.  
14  
15

16  
17  
18 In the regression analysis, we looked at the odds of having a socio-economic code, which indicates  
19  
20 gainful occupation in year 2 after stroke. The outcome variable was set to 1 if the person was self-  
21  
22 employed, assisting spouse or employee in that particular year. It was set to 0 if the person was  
23  
24 unemployed, not economically active or dead.  
25  
26

27  
28  
29 As explanatory variables we used gender, age, diagnosis, calendar year, occupational class, self-  
30  
31 employment, and type of municipality.  
32  
33

34  
35  
36 Age at the time of the stroke was divided into the categories 20 – 49 years and 50 – 57 years. In  
37  
38 Denmark it is possible to retire at the age of 60, regardless of health condition. Therefore we  
39  
40 excluded people being older than 60 years at follow-up. The cut-point 50 years conforms to  
41  
42 OECD's definition of older workers,[12] who are known to have a more insecure labor market  
43  
44 attachment than the younger ones.  
45  
46  
47  
48  
49

50  
51 The variable 'Diagnosis' contains the four stroke categories given in the section 'inclusion criteria'.  
52  
53

54  
55  
56 The variable 'Self-employment' was set to 1 if the person was self-employed or assisting spouse  
57  
58 and 0 if he/she was an employee, the year preceding the stroke.  
59  
60



1  
2  
3  
4  
5  
6  
7 The variable 'Occupational class' was based on the first digit of the DISCO-88 classification the  
8  
9 year preceding the stroke. It contains the following categories:

- 11 • Legislators, senior officials and managers (DISCO-88 group 1)
- 12
- 13 • professionals (DISCO-88 group 2)
- 14
- 15
- 16 • technicians and associate professionals (DISCO-88 group 3)
- 17
- 18
- 19 • workers in occupations that require skills at a basic level (DISCO-88 group 4 – 8)
- 20
- 21
- 22 • workers in elementary occupations (DISCO-88 group 9)
- 23
- 24 • gainfully occupied people with an unknown occupation (missing DISCO-88 code)
- 25
- 26
- 27

28 The variable 'Type of municipality' was set to 1 if the person lived in a municipality which had a  
29  
30 brain injury rehabilitation centre at the time of the stroke. Otherwise it was set to 0. The following  
31  
32 municipalities had a brain injury rehabilitation centre throughout the study period: Copenhagen,  
33  
34 Odense, Aarhus, Roskilde, Aalborg and Vejle.  
35  
36  
37  
38  
39

40 There are at least two reasons for believing that the RTW probabilities depended on which calendar  
41  
42 year the stroke occurred. Firstly, quality of stroke treatment and rehabilitation has a tendency to  
43  
44 improve with time.[13-15] Secondly, a series of political initiatives and legislative changes, aimed  
45  
46 at improving return to work rates in Denmark, occurred during the study period.[16]. We  
47  
48 incorporated calendar year into the model as a class variable to deal with this possible time  
49  
50 dependency.  
51  
52  
53  
54  
55

56 It is also reasonable to believe that RTW probabilities depend on place of residence. In Denmark,  
57  
58 municipalities play an important role in the return to work process. According to the law, it is the  
59  
60

1  
2  
3  
4 municipal officer and not the physician who has the formal right to decide whether or not a person  
5  
6 qualifies for sickness benefit, disability pension, or vocational rehabilitation. The law also stipulates  
7  
8 that the municipality should perform regular follow-up evaluations and draw up detailed  
9  
10 reintegration plans for each sick-listed citizen at risk of long-term sickness absence.[17] RTW  
11  
12 initiatives are often launched at the municipality level and some municipalities might be more  
13  
14 active than others. The unemployment situations may also differ between municipalities. In the  
15  
16 present study, we used a multi-level analysis to deal with intra-municipality correlations — the  
17  
18 municipalities were treated as the subjects while the individual observations within the  
19  
20 municipalities were treated as correlated repeated measurements.  
21  
22  
23  
24  
25  
26  
27

28 The logistic regression was performed by use of the GENMOD procedure in SAS version 9.1. Only  
29  
30 main effects were considered. We assumed an exchangeable correlation structure and we used the  
31  
32 empiric standard error estimates.  
33  
34  
35  
36

## 37 RESULTS

38  
39 In total, 19985 patients fulfilled the inclusion criteria. Due to emigration, we missed follow-up data  
40  
41 on 82 of them. The remaining 19903 patients were included in the analysis and 12375 (62.1%) of  
42  
43 these were gainfully occupied during the second calendar year after the stroke. At baseline, 49.9%  
44  
45 of the included patients were less than 50 years old and 39.1% were women.  
46  
47  
48  
49  
50

51 The variable 'municipality type' did not reach statistical significance but all other examined factors  
52  
53 proved to be significant predictors of return to work. Patients with intracerebral infarction had a  
54  
55 significantly higher chance of returning to work than patients with subarachnoid hemorrhage, who  
56  
57 in turn had a significantly better prognosis than those with intracerebral hemorrhage. Patients who  
58  
59  
60

1  
2  
3  
4 were employed before the stroke had a better prognosis than those who were self-employed;  
5  
6  
7 younger patients had a better prognosis than the older ones and men had a better prognosis than  
8  
9 women.  
10

11  
12  
13  
14 There was a clear relationship between the educational requirements of the job and the chance of  
15  
16 returning to work after stroke. Professionals had a significantly better prognosis than technicians  
17  
18 and associate professionals who in turn had a significantly better prognosis than workers in  
19  
20 occupations that only require skills at a basic level. The latter group had a significantly better  
21  
22 prognosis than workers employed in elementary occupations, where no education is required.  
23  
24  
25  
26  
27

28 Odds ratios for gainful occupation during the second calendar year after stroke are given in Table 1.  
29  
30 Table 2 gives the social group distribution of the post-stroke patients by time passed since onset of  
31  
32 illness.  
33  
34  
35  
36  
37  
38  
39  
40  
41  
42  
43  
44  
45  
46  
47  
48  
49  
50  
51  
52  
53  
54  
55  
56  
57  
58  
59  
60

**Table 1.** Odds ratios (OR), with 95% confidence interval (CI) for return to gainful occupation two year after stroke

| Parameter                          | Level                                                       | N     | Returns | OR   | 95% CI    |
|------------------------------------|-------------------------------------------------------------|-------|---------|------|-----------|
| Gender<br>(P < 0.0001)             | Men                                                         | 12114 | 7698    | 1.00 | -         |
|                                    | Women                                                       | 7789  | 4677    | 0.79 | 0.74-0.84 |
| Age<br>(P < 0.0001)                | < 50 years                                                  | 9930  | 6608    | 1.00 | -         |
|                                    | 50 - 57 years                                               | 9973  | 5767    | 0.61 | 0.57-0.65 |
| Diagnosis<br>(P < 0.0001)          | Subarachnoid hemorrhage                                     | 3449  | 2070    | 0.79 | 0.71-0.88 |
|                                    | Intracerebral hemorrhage                                    | 2272  | 976     | 0.39 | 0.35-0.43 |
|                                    | Cerebral infarction                                         | 5952  | 3820    | 1.00 | -         |
|                                    | Stroke, not specified as hemorrhage or infarction           | 8230  | 5509    | 1.14 | 1.06-1.23 |
| Self-employment<br>(P = 0.0083)    | No                                                          | 17916 | 11180   | 1.00 | -         |
|                                    | Yes                                                         | 1987  | 1195    | 0.87 | 0.78-0.96 |
| Occupational class<br>(P < 0.0001) | Legislators, senior officials and managers                  | 1231  | 822     | 2.31 | 2.00-2.68 |
|                                    | Professionals                                               | 2190  | 1624    | 3.04 | 2.70-3.43 |
|                                    | Technicians and associate professionals                     | 2980  | 2084    | 2.33 | 2.05-2.65 |
|                                    | Workers in occupations that require skills at a basic level | 9129  | 5478    | 1.50 | 1.38-1.64 |
|                                    | Workers in elementary occupations                           | 2475  | 1254    | 1.00 | -         |
|                                    | Gainfully occupied people NOS                               | 1898  | 1113    | 1.28 | 1.15-1.43 |
| Municipality type<br>(P = 0.2662)  | Municipality without brain injury centre                    | 15861 | 9908    | 1.00 | -         |
|                                    | Municipality with brain injury centre                       | 4042  | 2467    | 0.91 | 0.78-1.06 |

**Table 2.** Social group distribution (%) by time passed since onset of illness, among stroke patients in Denmark 1996-2006 who were 20-54 year of age and gainfully occupied at the time of the stroke

| Social status                   | Year after stroke |       |       |       |       |
|---------------------------------|-------------------|-------|-------|-------|-------|
|                                 | 1                 | 2     | 3     | 4     | 5     |
| Self-employed people            | 6.1               | 5.3   | 4.9   | 4.7   | 4.7   |
| Assisting spouses               | 0.3               | 0.2   | 0.2   | 0.2   | 0.2   |
| Employees                       | 64.9              | 58.8  | 55.7  | 53.6  | 51.4  |
| People on unemployment benefits | 1.9               | 2.3   | 2.1   | 2.3   | 2.3   |
| People in training/education    | 0.4               | 0.4   | 0.4   | 0.2   | 0.2   |
| Pensioners                      | 8.9               | 16.2  | 19.7  | 21.6  | 23.2  |
| Other not economically active   | 7.9               | 6.4   | 5.5   | 4.7   | 4.2   |
| Deceased                        | 9.5               | 10.4  | 11.6  | 12.7  | 14.0  |
| Total                           | 100.0             | 100.0 | 100.0 | 100.0 | 100.0 |

## DISCUSSION

1  
2  
3  
4 In the present study we have shown to what extent the odds for return to work after stroke depend  
5 on age, gender, occupational status, self-employment and type of stroke, and due to the size of the  
6 study we have done so with an extraordinary precision. The study did not require the participants to  
7 fill in a questionnaire; it was based solely on national registers. Recall bias and non-response bias  
8 were thereby eliminated. We also eliminated sampling bias by including the entire target  
9 population. Since the studied diagnoses require hospital treatment, referral bias should be minimal.  
10 Bias due to emigration should also be negligible since only 0.4% of the subjects emigrated during  
11 the ca. two-year follow-up period. The study is, moreover, free from hindsight bias; the statistical  
12 model was completely specified and a study protocol was published [18] before we looked at any  
13 relation between the exposure and response variables in our data material.  
14  
15  
16  
17  
18  
19  
20  
21  
22  
23  
24  
25  
26  
27  
28  
29

30 We had calendar day specific information on deaths, migrations and hospitalizations but, since the  
31 occupational data only were given per calendar year, we did not have exact dates of return to work.  
32 Moreover, only the main occupation and social group during a calendar year is recorded in the  
33 register. A person could, in other words, return to work in a given calendar year and still be counted  
34 as a non-returner if he, for example, was sickness absent or unemployed during the major part of  
35 that year. Another consequence of not having a calendar day specific occupational history was that  
36 we had to resort to logistic regression instead of time-to-event analysis, which is regarded as the  
37 choice method in modeling return to work.[5] That the participants had to return to a quite stable  
38 gainful occupation before they were categorized as having returned to work can, however, also be  
39 regarded as a strength. Many people with brain injury return to work too soon and subsequently find  
40 that they are unable to continue their employment.[1]  
41  
42  
43  
44  
45  
46  
47  
48  
49  
50  
51  
52  
53  
54  
55  
56  
57  
58  
59  
60

1  
2  
3  
4  
5 In the present study we showed that people whose stroke was due to intracerebral hemorrhage, on  
6  
7 average, had a worse prognosis than those with an intracerebral infarction. This finding is in  
8  
9 agreement with previous research, which indicates that people with a stroke caused by hemorrhage  
10  
11 tend to have more severe impairments at admission compared with those whose stroke is caused by  
12  
13 an infarction.[19-21] Stroke types, as given by the ICD-10 codes are, however, quite crude proxies  
14  
15 for stroke severity; it is obvious that a person with a miniscule intracerebral hemorrhage might have  
16  
17 a far better prognosis than someone with a massive cerebral infarction. In a prospective study on  
18  
19 1000 unselected stroke patients in Denmark,[19] stroke severity was the all important prognostic  
20  
21 factor; stroke type had no influence on neurologic outcome when stroke severity was controlled for.  
22  
23 Overall stroke severity is also the most consistent predictive factor for RTW.[17] The major  
24  
25 weakness of the present register study is that it lacks a direct severity measure, such as the  
26  
27 American Heart Association Stroke Outcome Classification,[22] the modified Rankin scale [23] or  
28  
29 the Barthel ADL Index.[24] Our chances of correctly estimating whether or not an individual  
30  
31 patient would return to work would have been considerably enhanced by such measures. The results  
32  
33 of the present study are therefore more useful when viewed from a public health perspective than  
34  
35 they are from a clinical perspective. At the group level, the results can be used to estimate the  
36  
37 proportion of patients that is expected to return to work. The study thereby provides a comparison  
38  
39 material, which can be used by, for example, hospitals or municipalities to evaluate return to work  
40  
41 programs.  
42  
43  
44  
45  
46  
47  
48  
49  
50

51  
52 The prognosis among people with the ICD-10 code I64 (stroke, not specified as hemorrhage or  
53  
54 infarction) is somewhat paradoxical. Stroke that is caused by either hemorrhage or infarction should  
55  
56 not be associated with a better prognosis than both stroke specified as hemorrhage and stroke  
57  
58 specified as infarction. The elevated odds for returning to work in this ill-defined patient group  
59  
60

1  
2  
3  
4 suggest that many of the people who were given the diagnosis I64 did not have a stroke in the first  
5  
6  
7 place.

8  
9  
10  
11 The fact that men had a better chance of returning to work than women and the large difference  
12  
13 between them is another paradoxical finding. Previous research does not indicate that female stroke  
14  
15 patients have a worse functional recovery than the male patients.[25;26] It has, moreover, been  
16  
17 shown that age-specific life expectancy after stroke is far better among women than men.[27] It is  
18  
19 therefore reasonable to believe that at least a part of the gender difference observed in the present  
20  
21 study is due to cultural rather than physiologic factors. For example, in many cultures, a part of the  
22  
23 male identity is to be responsible for providing for the household (being the breadwinner). In such  
24  
25 cultures, a man who returns to work would not only regain his employment and stable income but  
26  
27 also his male identity.[28] Although Denmark is considered a modern country where men and  
28  
29 women in many respects are treated as equals, attitudes and behavior might still be influenced by  
30  
31 the more traditional gender roles with regard to being a provider versus allowing oneself to be  
32  
33 provided for. It is possible that these ancient gender roles influenced not only the patient but also  
34  
35 the municipality official who is to decide whether or not a person qualifies for sickness benefit,  
36  
37 disability pension, or vocational rehabilitation. Since stress is believed to be an important risk factor for  
38  
39 stroke,[29] it is also possible that a part of the observed gender difference in RTW rates was due to a higher  
40  
41 health and safety awareness and a lower propensity to take risks among women[30;31]

42  
43  
44  
45  
46  
47  
48  
49  
50  
51 Previous research on the relationship between occupational class and return to work after stroke was  
52  
53 performed on patient samples that were too small to subdivide further than into white versus blue-  
54  
55 collar workers. The observed white versus blue-collar odds-ratios for return to work were 4.72  
56  
57 (USA, 1968-73), 1.19 (USA, 1980's), 1.43 (Japan, 1986-90) and 2.99 (Sweden, 1990's).[2;6;8;32]

58  
59  
60 In the present study, we have shown that it is not only the physical requirements of the work

1  
2  
3  
4 (manual versus non-manual) that matters but that inequalities also exist between occupational  
5  
6 classes within the blue and white-collar categories. Although stroke is highly associated with  
7  
8 cognitive impairments,[33] we found that the probability of returning to work increased with the  
9  
10 educational requirements of the job. This may sound counter intuitive at first. The investigated  
11  
12 socio-occupational classes differ, however, not only in cognitive demands but also in respect to  
13  
14 other psychosocial factors. There is, for example, a positive relationship between the educational  
15  
16 requirements of the job and the possibilities to influence the volume as well as the content of ones  
17  
18 work [34] and this is a factor which can play an important role in the return to work process.[1]  
19  
20  
21 Educational requirements are also positively correlated with 'meaning of work'.[34]  
22  
23  
24  
25  
26  
27

28 Patients in municipalities with a brain injury rehabilitation centre did not have a better prognosis  
29  
30 than patients in other municipalities. This null-finding might be due to factors that have nothing to  
31  
32 do with the centres. As only a minority of the patients is treated at a brain rehabilitation centre, our  
33  
34 study can not determine the effectiveness of the centres. It stresses, however, the importance of  
35  
36 testing the workability of the centres in a randomized controlled trial before it is decided whether or  
37  
38 not they should be recommended as an efficient RTW strategy.  
39  
40  
41  
42  
43  
44

45 In conclusion, RTW strategies for post-stroke patients ought to focus especially on the inequalities  
46  
47 between the genders and socioeconomic groups. Further research is needed to explain the gender  
48  
49 inequality, which suggests either a potential to improve return-to-work rates among the females or a  
50  
51 tendency among the males to return too early.  
52  
53  
54  
55

## 56 **ACKNOWLEDGEMENTS**

57  
58 Sannie Vester Thorsen, Kathrine Carlsen, Mogens Haulund Andersen, Trine Lehmann Lund and Jakob  
59  
60



1  
2  
3  
4 Bue Bjørner at the National Research Centre for the Working Environment (NRCWE) are thanked for  
5  
6 valuable discussions. Elizabeth Bengtsen and Rikke Nilsson, NRCWE, are thanked for their assistance  
7  
8 in the obtainment of references.  
9  
10

## 11 12 13 14 **FUNDING SOURCES**

15  
16 The study was funded by The Danish National Labour Market Authority, grant number 2008-5231.  
17  
18

## 19 20 21 **DISCLOSURES**

22  
23 Frank Humle, one of the authors, is Director of the Centre for Rehabilitation of Brain Injury (CRBI)  
24  
25 in Copenhagen, Denmark. CRBI is a self-owned fund which is financially supported by grants from  
26  
27 the Danish municipalities and, to a lesser degree, by a collectively bargained framework agreement  
28  
29 under the Danish Health Law that covers 20% of the funds' operation costs. Since the study could  
30  
31 tell us whether or not stroke patients in municipalities with brain injury rehabilitation centres have a  
32  
33 better prognosis than those in other municipalities, there was a potential conflict of interest. We  
34  
35 believe, however, that any potential bias due to competing interests was eliminated by the  
36  
37 publication of our detailed study protocol,[18] which implied a commitment to adhere to the  
38  
39 methods chosen and to publish the results regardless of the outcome.  
40  
41  
42  
43  
44  
45

## 46 **Reference List**

- 47  
48 (1) Wolfenden B, Grace M. Returning to work after stroke: a review. *Int J Rehabil Res*  
49 2009;32:93-97.  
50  
51 (2) Vestling M, Tufvesson B, Iwarsson S. Indicators for return to work after stroke and the  
52 importance of work for subjective well-being and life satisfaction. *J Rehabil Med*  
53 2003;35:127-131.  
54  
55 (3) Shames J, Treger I, Ring H, Giaquinto S. Return to work following traumatic brain injury:  
56 trends and challenges. *Disabil Rehabil* 2007;29:1387-1395.  
57  
58 (4) Di CA. Human and economic burden of stroke. *Age Ageing* 2009;38:4-5.  
59  
60

- 1
- 2
- 3
- 4
- 5 (5) Daniel K, Wolfe CD, Busch MA, McKeivitt C. What are the social consequences of stroke
- 6 for working-aged adults? A systematic review. *Stroke* 2009;40:e431-e440.
- 7
- 8 (6) Saeki S, Ogata H, Okubo T, Takahashi K, Hoshuyama T. Return to work after stroke. A
- 9 follow-up study. *Stroke* 1995;26:399-401.
- 10
- 11 (7) Glozier N, Hackett ML, Parag V, Anderson CS. The influence of psychiatric morbidity on
- 12 return to paid work after stroke in younger adults: the Auckland Regional Community
- 13 Stroke (ARCOS) Study, 2002 to 2003. *Stroke* 2008;39:1526-1532.
- 14
- 15 (8) Wozniak MA, Kittner SJ, Price TR, Hebel JR, Sloan MA, Gardner JF. Stroke location is not
- 16 associated with return to work after first ischemic stroke. *Stroke* 1999;30:2568-2573.
- 17
- 18 (9) Soll-Johanning H, Hannerz H, Tuchsén F. Referral bias in hospital register studies of
- 19 geographical and industrial differences in health. *Dan Med Bull* 2004;51:207-210.
- 20
- 21 (10) *Statistics Denmark. DISCO-88 statistics Denmark's standard classification of occupations.*
- 22 Copenhagen: Statistics Denmark, 1996.
- 23
- 24 (11) *Statistics Denmark. SOCIO Danmarks Statistiks Socioøkonomiske Klassifikation.* 1st ed.
- 25 Copenhagen: Statistics Denmark, 1997.
- 26
- 27 (12) Keese M. *Live longer, work longer. Aging and employment policies.* Paris: OECD
- 28 publications, 2006.
- 29
- 30 (13) Immonen-Raiha P, Mahonen M, Tuomilehto J et al. Trends in case-fatality of stroke in
- 31 Finland during 1983 to 1992. *Stroke* 1997;28:2493-2499.
- 32
- 33 (14) Pajunen P, Paakkonen R, Hamalainen H et al. Trends in fatal and nonfatal strokes among
- 34 persons aged 35 to > or =85 years during 1991-2002 in Finland. *Stroke* 2005;36:244-248.
- 35
- 36 (15) Roberts SE, Goldacre MJ. Case fatality rates after admission to hospital with stroke: linked
- 37 database study. *BMJ* 2003;326:193-194.
- 38
- 39 (16) Johansen K, Andersen JS, Mikkelsen S, Pass O, Raffnsøe S, Lynge E. Controlling sickness
- 40 absence: a study of changes in the Danish sickness absence legislation since 1973. *Health*
- 41 *Policy* 2008;86:109-118.
- 42
- 43 (17) Treger I, Shames J, Giaquinto S, Ring H. Return to work in stroke patients. *Disabil Rehabil*
- 44 2007;29:1397-1403.
- 45
- 46 (18) Hannerz H, Pedersen BH, Poulsen OM, Humle F, Andersen LL. Study protocol to a
- 47 nationwide prospective cohort study on return to gainful occupation after stroke in Denmark
- 48 1. *BMC Public Health* 2010;10:623.
- 49
- 50 (19) Jorgensen HS, Nakayama H, Raaschou HO, Olsen TS. Intracerebral hemorrhage versus
- 51 infarction: stroke severity, risk factors, and prognosis. *Ann Neurol* 1995;38:45-50.
- 52
- 53
- 54
- 55
- 56
- 57
- 58
- 59
- 60

- 1  
2  
3  
4  
5 (20) Kelly PJ, Furie KL, Shafqat S, Rallis N, Chang Y, Stein J. Functional recovery following  
6 rehabilitation after hemorrhagic and ischemic stroke. *Arch Phys Med Rehabil* 2003;84:968-  
7 972.  
8  
9 (21) Katrak PH, Black D, Peeva V. Do stroke patients with intracerebral hemorrhage have a  
10 better functional outcome than patients with cerebral infarction? *PM R* 2009;1:427-433.  
11  
12 (22) Kelly-Hayes M, Robertson JT, Broderick JP et al. The American Heart Association Stroke  
13 Outcome Classification. *Stroke* 1998;29:1274-1280.  
14  
15 (23) van Swieten JC, Koudstaal PJ, Visser MC, Schouten HJ, van GJ. Interobserver agreement  
16 for the assessment of handicap in stroke patients. *Stroke* 1988;19:604-607.  
17  
18 (24) Collin C, Wade DT, Davies S, Horne V. The Barthel ADL Index: a reliability study. *Int*  
19 *Disabil Stud* 1988;10:61-63.  
20  
21 (25) Wade DT, Hewer RL, Wood VA. Stroke: influence of patient's sex and side of weakness on  
22 outcome. *Arch Phys Med Rehabil* 1984;65:513-516.  
23  
24 (26) Bonita R, Beaglehole R. Recovery of motor function after stroke. *Stroke* 1988;19:1497-  
25 1500.  
26  
27 (27) Hannerz H, Nielsen ML. Life expectancies among survivors of acute cerebrovascular  
28 disease. *Stroke* 2001;32:1739-1744.  
29  
30 (28) Bouta T, Frekrs G, Bannon I. *Gender, Conflict and Development*. Washington DC: World  
31 Bank Publications, 2004.  
32  
33 (29) Truelsen T, Nielsen N, Boysen G, Gronbaek M. Self-reported stress and risk of stroke: the  
34 Copenhagen City Heart Study. *Stroke* 2003;34:856-862.  
35  
36 (30) Powell M, Ansic D. Gender Difference in Risk Behaviour in Financial Decision-Making:  
37 An Experimental Analysis. *J Econ Psychol* 1997;18:605-628.  
38  
39 (31) Wilson M, Daly M, Gordon S, Pratt A. Sex differences in valuations of the environment?  
40 *Population & Environment* 1996;18:143-159.  
41  
42 (32) Howard G, Till JS, Toole JF, Matthews C, Truscott BL. Factors influencing return to work  
43 following cerebral infarction. *JAMA* 1985;253:226-232.  
44  
45 (33) Hoffmann M. Higher cortical function deficits after stroke: an analysis of 1,000 patients  
46 from a dedicated cognitive stroke registry. *Neurorehabil Neural Repair* 2001;15:113-127.  
47  
48 (34) Moncada S, Pejtersen JH, Navarro A et al. Psychosocial work environment and its  
49 association with socioeconomic status. A comparison of Spain and Denmark. *Scand J Public*  
50 *Health* 2010;38:137-148.  
51  
52  
53  
54  
55  
56  
57  
58  
59  
60

1 STROBE Statement—Checklist of items that should be included in reports of *cohort studies*

|                              | Item No | Recommendation                                                                                                                                                                                                                                                                                                                                                                                                |
|------------------------------|---------|---------------------------------------------------------------------------------------------------------------------------------------------------------------------------------------------------------------------------------------------------------------------------------------------------------------------------------------------------------------------------------------------------------------|
| <b>Title and abstract</b>    | 1       | (a) Indicate the study's design with a commonly used term in the title or the abstract<br>(b) Provide in the abstract an informative and balanced summary of what was done and what was found                                                                                                                                                                                                                 |
| <b>Introduction</b>          |         |                                                                                                                                                                                                                                                                                                                                                                                                               |
| Background/rationale         | 2       | Explain the scientific background and rationale for the investigation being reported                                                                                                                                                                                                                                                                                                                          |
| Objectives                   | 3       | State specific objectives, including any prespecified hypotheses                                                                                                                                                                                                                                                                                                                                              |
| <b>Methods</b>               |         |                                                                                                                                                                                                                                                                                                                                                                                                               |
| Study design                 | 4       | Present key elements of study design early in the paper                                                                                                                                                                                                                                                                                                                                                       |
| Setting                      | 5       | Describe the setting, locations, and relevant dates, including periods of recruitment, exposure, follow-up, and data collection                                                                                                                                                                                                                                                                               |
| Participants                 | 6       | (a) Give the eligibility criteria, and the sources and methods of selection of participants. Describe methods of follow-up<br>(b) For matched studies, give matching criteria and number of exposed and unexposed                                                                                                                                                                                             |
| Variables                    | 7       | Clearly define all outcomes, exposures, predictors, potential confounders, and effect modifiers. Give diagnostic criteria, if applicable                                                                                                                                                                                                                                                                      |
| Data sources/<br>measurement | 8*      | For each variable of interest, give sources of data and details of methods of assessment (measurement). Describe comparability of assessment methods if there is more than one group                                                                                                                                                                                                                          |
| Bias                         | 9       | Describe any efforts to address potential sources of bias                                                                                                                                                                                                                                                                                                                                                     |
| Study size                   | 10      | Explain how the study size was arrived at                                                                                                                                                                                                                                                                                                                                                                     |
| Quantitative variables       | 11      | Explain how quantitative variables were handled in the analyses. If applicable, describe which groupings were chosen and why                                                                                                                                                                                                                                                                                  |
| Statistical methods          | 12      | (a) Describe all statistical methods, including those used to control for confounding<br>(b) Describe any methods used to examine subgroups and interactions<br>(c) Explain how missing data were addressed<br>(d) If applicable, explain how loss to follow-up was addressed<br>(e) Describe any sensitivity analyses                                                                                        |
| <b>Results</b>               |         |                                                                                                                                                                                                                                                                                                                                                                                                               |
| Participants                 | 13*     | (a) Report numbers of individuals at each stage of study—eg numbers potentially eligible, examined for eligibility, confirmed eligible, included in the study, completing follow-up, and analysed<br>(b) Give reasons for non-participation at each stage<br>(c) Consider use of a flow diagram                                                                                                               |
| Descriptive data             | 14*     | (a) Give characteristics of study participants (eg demographic, clinical, social) and information on exposures and potential confounders<br>(b) Indicate number of participants with missing data for each variable of interest<br>(c) Summarise follow-up time (eg, average and total amount)                                                                                                                |
| Outcome data                 | 15*     | Report numbers of outcome events or summary measures over time                                                                                                                                                                                                                                                                                                                                                |
| Main results                 | 16      | (a) Give unadjusted estimates and, if applicable, confounder-adjusted estimates and their precision (eg, 95% confidence interval). Make clear which confounders were adjusted for and why they were included<br>(b) Report category boundaries when continuous variables were categorized<br>(c) If relevant, consider translating estimates of relative risk into absolute risk for a meaningful time period |

|                          |    |                                                                                                                                                                            |
|--------------------------|----|----------------------------------------------------------------------------------------------------------------------------------------------------------------------------|
| Other analyses           | 17 | Report other analyses done—eg analyses of subgroups and interactions, and sensitivity analyses                                                                             |
| <b>Discussion</b>        |    |                                                                                                                                                                            |
| Key results              | 18 | Summarise key results with reference to study objectives                                                                                                                   |
| Limitations              | 19 | Discuss limitations of the study, taking into account sources of potential bias or imprecision. Discuss both direction and magnitude of any potential bias                 |
| Interpretation           | 20 | Give a cautious overall interpretation of results considering objectives, limitations, multiplicity of analyses, results from similar studies, and other relevant evidence |
| Generalisability         | 21 | Discuss the generalisability (external validity) of the study results                                                                                                      |
| <b>Other information</b> |    |                                                                                                                                                                            |
| Funding                  | 22 | Give the source of funding and the role of the funders for the present study and, if applicable, for the original study on which the present article is based              |

\*Give information separately for exposed and unexposed groups.

**Note:** An Explanation and Elaboration article discusses each checklist item and gives methodological background and published examples of transparent reporting. The STROBE checklist is best used in conjunction with this article (freely available on the Web sites of PLoS Medicine at <http://www.plosmedicine.org/>, Annals of Internal Medicine at <http://www.annals.org/>, and Epidemiology at <http://www.epidem.com/>). Information on the STROBE Initiative is available at <http://www.strobe-statement.org>.



**A nationwide prospective cohort study on return to gainful occupation after stroke in Denmark 1996 – 2006**

|                                 |                                                                                                                                                                                                                                                                                                                                                                  |
|---------------------------------|------------------------------------------------------------------------------------------------------------------------------------------------------------------------------------------------------------------------------------------------------------------------------------------------------------------------------------------------------------------|
| Journal:                        | <i>BMJ Open</i>                                                                                                                                                                                                                                                                                                                                                  |
| Manuscript ID:                  | bmjopen-2011-000180.R1                                                                                                                                                                                                                                                                                                                                           |
| Article Type:                   | Research                                                                                                                                                                                                                                                                                                                                                         |
| Date Submitted by the Author:   | 23-Jun-2011                                                                                                                                                                                                                                                                                                                                                      |
| Complete List of Authors:       | Hannerz, Harald; National Research Centre for the Working Environment<br>Holbaek Pedersen, Betina; National Research Centre for the Working Environment<br>Poulsen, Otto; National Research Centre for the Working Environment<br>Andersen, Lars; National Research Centre for the Working Environment<br>Frank, Humle; Centre of Rehabilitation of Brain Injury |
| <b>Primary Subject Heading</b>: | Rehabilitation medicine                                                                                                                                                                                                                                                                                                                                          |
| Keywords:                       | STROKE MEDICINE, REHABILITATION MEDICINE, OCCUPATIONAL & INDUSTRIAL MEDICINE, SOCIAL MEDICINE                                                                                                                                                                                                                                                                    |
|                                 |                                                                                                                                                                                                                                                                                                                                                                  |

SCHOLARONE™  
Manuscripts

Only

1  
2  
3 **A nationwide prospective cohort study on return to gainful occupation after**  
4  
5 **stroke in Denmark 1996 – 2006**  
6

7 Harald Hannerz<sup>1</sup>, Betina Holbæk Pedersen<sup>1</sup>, Otto M. Poulsen<sup>1</sup>, Frank Humle<sup>2</sup>, Lars L. Andersen<sup>1</sup>  
8  
9

10  
11 1. National Research Centre for the Working Environment, Lersø Parkalle 105, 2100 Copenhagen,  
12  
13 Denmark.  
14

15 2. Centre of Rehabilitation of Brain Injury, Amagerfælledvej 56A, 2300 Copenhagen, Denmark.  
16  
17

18  
19 Corresponding author: Harald Hannerz. E-mail: [hha@nrcwe.dk](mailto:hha@nrcwe.dk). Phone: +45 39 16 54 60. Fax: +45  
20  
21 39 16 52 01  
22  
23

24  
25  
26  
27 Word count: [3464](#)  
28  
29  
30  
31  
32  
33  
34  
35  
36  
37  
38  
39  
40  
41  
42  
43  
44  
45  
46  
47  
48  
49  
50  
51  
52  
53  
54  
55  
56  
57  
58  
59  
60

Deleted: 3093

## ABSTRACT

**Background:** Return to work is an important outcome factor for working-age post stroke patients.

Previous epidemiologic studies on this topic have been small (on average 125 patients per study).

Their estimated effects are therefore associated with a tremendous statistical uncertainty. The present study estimates the effect of various predictors on the odds of returning to work after stroke in the total population of 20-57 year-old previously employed hospital treated stroke patients in Denmark 1996 – 2006 (N = 19985).

**Methods and Results:** The patients were followed through national registers; 62% were gainfully

occupied two years after stroke. [The odds of returning to work were higher among people with intracerebral infarction, OR = 1.0 \(the reference group\), than they were among people with subarachnoid haemorrhage, OR = 0.79 \(95% CI: 0.71 – 0.88\), and intracerebral haemorrhage, OR = 0.39 \(0.35 – 0.43\). The odds of returning to work were lower among workers in elementary occupations OR = 1.0 \(reference group\) than they were among workers in occupations that require skills at a basic level, OR = 1.50 \(1.38 – 1.64\), technicians and associate professionals, OR = 2.33 \(2.05 – 2.65\), and professionals, OR = 3.04 \(2.70 – 3.43\). Patients in municipalities with a brain injury rehabilitation centre did not have a better prognosis than patients in other municipalities, OR = 0.91 \(0.78 – 1.06\). Being a woman, OR = 0.79 \(0.74 – 0.84\), self-employed, OR = 0.87 \(0.78 – 0.96\), or >= 50 years, OR = 0.61 \(0.57 – 0.65\), was associated with an adverse prognosis.](#)

**Conclusion:** Further research is needed to explain the gender inequality, which suggests either a potential to improve return-to-work rates among the females or a tendency among the males to return too early.

**KEY WORDS:** cerebral infarct; intracerebral [haemorrhage](#); subarachnoid [haemorrhage](#); [rehabilitation](#); work ability.

Formatted: English (U.K.)

Formatted: English (U.K.)

**Deleted:** Patients with intracerebral infarction (reference group) had significantly higher chance of returning to work than those with subarachnoid hemorrhage, OR = 0.79 (95% CI: 0.71 – 0.88), and intracerebral hemorrhage, OR = 0.39 (0.35 – 0.43). Unskilled workers (reference group) had a worse prognosis than skilled workers, OR = 1.50 (1.38 – 1.64), technicians and associate professionals, OR = 2.33 (2.05 – 2.65), and professionals, OR = 3.04 (2.70 – 3.43). Being a woman, OR = 0.79 (0.74 – 0.84), self-employed, OR = 0.87 (0.78 – 0.96), or >= 50 years, OR = 0.61 (0.57 – 0.65), was also associated with a worse prognosis. Patients in municipalities with a brain injury rehabilitation centre did not have a better prognosis than patients in other municipalities, OR = 0.91 (0.78 – 1.06).

**Deleted:** hemorrhage

**Deleted:** hemorrhage

Formatted: English (U.K.)

Formatted: English (U.K.)



## ARTICLE SUMMARY

### Article focus

- The present study estimates odds ratios for return to gainful occupation ca. two years after stroke.
- It focuses on clinical, demographic and occupational factors which are potentially useful in predicting return to work.
- The study includes the total population of 20-57 year-old previously employed hospital treated stroke patients in Denmark 1996 – 2006.

Formatted: English (U.K.)

### Key messages

- 62% of the studied patients were gainfully occupied during the second calendar year after the stroke.
- The odds of returning to work depend on age, gender, occupation, self-employment and type of stroke.
- Women had a much lower chance of returning to work than men and to our knowledge there are no known physiologic factors which can justify this difference.
- Patients in municipalities with a brain injury rehabilitation centre did not have a better prognosis than patients in other municipalities.

Formatted: English (U.K.)

### Strengths and limitations of this study

- The follow-up was done through registers and all people in the target population were included. Hence, the study is free from sampling bias, recall bias and non-response bias.
- The statistical model was completely defined and a detailed study protocol was published before we looked at any relation between the concerned exposure and response variables in our data material. Since we adhered to the protocol, the study is free from hindsight bias.
- The study is further strengthened by its size.
- The major weakness of the study is that it does not contain any stroke severity measures.

## INTRODUCTION

Return to work (RTW) plays a crucial role in the rehabilitation process of working age post-stroke patients. It provides a social identity and it is associated with increased self-esteem and life satisfaction.[1-3] It is also important, from a societal perspective, that as many as possible of the stroke patients who are economically active at the time of the onset, return to work after stroke; in the European Union, the annual cost of lost productivity due to disability or death as a consequence of stroke was estimated at €8.5 billion in 2008.[4]

A recent review of articles dealing with return to work among stroke patients identified 70 studies, which in total comprised 8810 patients working before the stroke.[5] The review concluded that the analytic strategies that were used were inappropriate in all but three of the 70 studies.[6-8] The rest of the studies were associated either with selection bias or non-interpretable results due to highly variable follow-up periods or ill-defined criteria of work before stroke and at follow-up.[5] There are also limitations associated with the three appropriately performed studies. All of them were small (the included number of patients ranged from 109 to 173) and two of them [6;8] deal with data that are too old to afford results that can be used as proxies for present time RTW probabilities. The most recent of the three studies [7] reported that 55% of previously employed stroke patients in New Zealand returned to paid employment within six months. That study is, however, associated with selection bias; it only included cognitively competent patients.

[The present study estimates the effect of various predictors on the odds of returning to work after stroke. It covers the total population of 20-57 year-old previously employed hospital treated stroke patients in Denmark 1996 – 2006.](#)

Formatted: English (U.K.)

Deleted: s

Deleted: The present study investigates return to work frequencies among nearly twenty thousand 20 – 57 year-old stroke patients in Denmark who were gainfully occupied prior to the stroke. The study covers stroke that occurred in the time period 1996 – 2006.¶

Formatted: English (U.K.)

## MATERIAL AND METHODS

The study utilizes the Danish Occupational [Hospitalisation Register](#) (OHR), a database obtained through a record-linkage between three national registers—the central person register, the hospital [patient](#) register, and the employment classification module. Currently, the OHR includes every person who has been economically active and an inhabitant of Denmark sometime after 1980. The national hospital [patient](#) register has existed since 1977 and contains data from all public hospitals in Denmark (more than 99% of all admissions). From 1977 to 1994, the register only included inpatients but from 1995 it also covers outpatients and emergency ward visits.[9] The diagnoses have been coded according to international classification of diseases version ten (ICD-10) since 1994.

The central person register contains information on gender, addresses and dates of birth, death and migrations for every person who is or has been an inhabitant of Denmark sometime between 1968 and present time. A person's occupation and social status are, since 1975, registered annually in the employment classification module.[9] [A person is classified according to his/her main income during the year.](#) The occupations are, since 1994, coded in accordance with Statistics Denmark's Standard Classification of Occupations (DISCO-88),[10] which is a national version of the International Standard Classification of Occupations (ISCO-88). Socio-economic status is coded in accordance with Statistics Denmark's official socio-economic classification.[11] At the one- and two-digit level, the classification contains the following social groups:

1. Gainfully occupied people
  - 1.1. Self-employed people
  - 1.2. Assisting spouses
  - 1.3. Employees

Deleted: Hospitalization

Formatted: English (U.K.)

2. People on unemployment benefits
3. Not economically active
  - 3.1. People in training/education
  - 3.2. Pensioners
  - 3.3. Other not economically active

### Inclusion criteria

A person would be included in the study if he/she

1. on at least one occasion in the time period 1996 – 2006, was registered in the hospital patient registry with one of the following ICD-10 codes as principal diagnosis:
  - I60 subarachnoid [haemorrhage](#)
  - I61 intracerebral [haemorrhage](#)
  - I63 cerebral infarction
  - I64 stroke, not specified as [haemorrhage](#) or infarction
2. belonged to the age interval 20 – 57 years at the time of the hospital contact
3. was gainfully occupied the year preceding the hospital contact

Deleted: hemorrhage

Deleted: hemorrhage

Formatted: English (U.K.)

Formatted: English (U.K.)

Deleted: hemorrhage

Formatted: English (U.K.)

### Accuracy of the databases

Age and gender are part of the personal identification number of the central person register, which is recorded almost without errors. The completeness and accuracy of the data were confirmed in the matching process where we had a 100% match of the files. A person is classified according to his/her main income during the year. The socio-economic categories given above are based on incomes, which are declared to the Danish tax authority. This information should be correct among people who declare their income correctly. The occupational code, which is provided by the

Formatted: Font: Bold, English (U.K.)

Formatted: English (U.K.)

1  
2  
3 [employer, is less reliable and is missing for almost 10% of the employees. For circulatory disease,](#)  
4 [the ICD-10 code of the principal diagnosis given in the hospital patient register has been estimated](#)  
5 [to be accurate in 73.4% of the records.\[12\].](#)

Deleted:

Field Code Changed

Formatted: Not Superscript/  
Subscript

Formatted: English (U.K.)

Deleted: Ethical

Formatted: English (U.K.)

### 6 7 8 9 10 11 **Ethics approval**

12 The study has been notified to and registered by Datatilsynet (the Danish Data Protection Agency).

13 According to Danish law, questionnaire and register based studies do not need approval by ethical  
14 and scientific committees, nor informed consent.  
15  
16  
17

### 18 19 20 21 **Statistical analysis**

22 The study consists of two parts, one is descriptive while the other utilizes statistical inference  
23 techniques to test hypotheses and estimate odds ratios for RTW (return to work).  
24  
25  
26  
27

28 In the descriptive part we followed the stroke patients for five calendar years after the stroke for  
29 their main social status in each of these years. This part of the study only included people who were  
30 less than 55 years at the time of the stroke. For any given patient, the calendar year of the stroke  
31 was defined as year 0, the next calendar year was defined as year 1 etc.  
32  
33  
34  
35  
36  
37

38 In the regression analysis, we looked at the odds of having a socio-economic code, which indicates  
39 gainful occupation in year 2 after stroke. The outcome variable was set to 1 if the person was self-  
40 employed, assisting spouse or employee in that particular year. It was set to 0 if the person was  
41 unemployed, not economically active or dead.  
42  
43  
44  
45  
46  
47  
48  
49  
50  
51  
52  
53  
54  
55  
56  
57  
58  
59  
60

1  
2  
3 As explanatory variables we used gender, age, diagnosis, calendar year, occupational class, self-  
4 employment, and type of municipality.  
5  
6  
7

8  
9 Age at the time of the stroke was divided into the categories 20 – 49 years and 50 – 57 years. In  
10 Denmark it is possible to retire at the age of 60, regardless of health condition. Therefore we  
11 excluded people being older than 60 years at follow-up. The cut-point 50 years conforms to  
12 OECD's definition of older workers,<sup>[13]</sup> who are known to have a more insecure [labour](#) market  
13 attachment than the younger ones. Deleted: labor  
14  
15  
16  
17 Formatted: English (U.K.)

18  
19  
20 The variable 'Diagnosis' contains the four stroke categories given in the section 'inclusion criteria'.  
21  
22

23  
24 The variable 'Self-employment' was set to 1 if the person was self-employed or assisting spouse  
25 and 0 if he/she was an employee, the year preceding the stroke.  
26  
27

28  
29  
30 The variable 'Occupational class' was based on the first digit of the DISCO-88 classification the  
31 year preceding the stroke. It contains the following categories:  
32

- 33 • Legislators, senior officials and managers (DISCO-88 group 1)
- 34 • professionals (DISCO-88 group 2)
- 35 • technicians and associate professionals (DISCO-88 group 3)
- 36 • workers in occupations that require skills at a basic level (DISCO-88 group 4 – 8)
- 37 • workers in elementary occupations (DISCO-88 group 9)
- 38 • gainfully occupied people with an unknown occupation (missing DISCO-88 code)
- 39
- 40
- 41
- 42
- 43
- 44
- 45
- 46
- 47
- 48
- 49
- 50
- 51
- 52
- 53
- 54
- 55
- 56
- 57
- 58
- 59
- 60

1  
2  
3 The variable 'Type of municipality' was set to 1 if the person lived in a municipality which had a  
4 brain injury rehabilitation centre at the time of the stroke. Otherwise it was set to 0. The following  
5 municipalities had a brain injury rehabilitation centre throughout the study period: Copenhagen,  
6  
7 Odense, Aarhus, Roskilde, Aalborg and Vejle.  
8  
9

10  
11  
12 There are at least two reasons for believing that the RTW probabilities depended on which calendar  
13 year the stroke occurred. Firstly, quality of stroke treatment and rehabilitation has a tendency to  
14 improve with time.[14-16] Secondly, a series of political initiatives and legislative changes, aimed  
15 at improving return to work rates in Denmark, occurred during the study period.[17]. We  
16 incorporated calendar year into the model as a class variable to deal with this possible time  
17 dependency.  
18  
19  
20  
21  
22  
23  
24  
25

26 It is also reasonable to believe that RTW probabilities depend on place of residence. In Denmark,  
27 municipalities play an important role in the return to work process. According to the law, it is the  
28 municipal officer and not the physician who has the formal right to decide whether or not a person  
29 qualifies for sickness benefit, disability pension, or vocational rehabilitation. The law also stipulates  
30 that the municipality should perform regular follow-up evaluations and draw up detailed  
31 reintegration plans for each sick-listed citizen at risk of long-term sickness absence.[18] RTW  
32 initiatives are often launched at the municipality level and some municipalities might be more  
33 active than others. The unemployment situations may also differ between municipalities. In the  
34 present study, we used a multi-level analysis to deal with intra-municipality correlations — the  
35 municipalities were treated as the subjects while the individual observations within the  
36 municipalities were treated as correlated repeated measurements.  
37  
38  
39  
40  
41  
42  
43  
44  
45  
46  
47  
48  
49  
50  
51  
52  
53  
54  
55  
56  
57  
58  
59  
60

1  
2  
3 The logistic regression was performed by use of the GENMOD procedure in SAS version 9.1. Only  
4 main effects were considered. We assumed an exchangeable correlation structure and we used the  
5 empiric standard error estimates. [The reference groups were chosen more or less arbitrarily, before](#)  
6 [we looked at any results. An odds ratio which is higher than one indicates that the odds of returning](#)  
7 [to work are higher than they are in the reference group.](#)  
8  
9  
10  
11  
12

## 13 14 15 RESULTS

16 In total, 19985 patients fulfilled the inclusion criteria. Due to emigration, we missed follow-up data  
17 on 82 of them. The remaining 19903 patients were included in the analysis and 12375 (62.1%) of  
18 these were gainfully occupied during the second calendar year after the stroke. At baseline, 49.9%  
19 of the included patients were less than 50 years old and 39.1% were women.  
20  
21  
22  
23  
24  
25

26 The variable 'municipality type' did not reach statistical significance but all other examined factors  
27 proved to be significant predictors of return to work. Patients with intracerebral infarction had a  
28 significantly higher chance of returning to work than patients with subarachnoid [haemorrhage](#), who  
29 in turn had a significantly better prognosis than those with intracerebral [haemorrhage](#). Patients who  
30 were employed before the stroke had a better prognosis than those who were self-employed;  
31  
32  
33  
34  
35  
36  
37  
38  
39  
40  
41  
42  
43  
44  
45  
46  
47  
48  
49  
50  
51  
52  
53  
54  
55  
56  
57  
58  
59  
60

Deleted: hemorrhage

Deleted: hemorrhage

Formatted: English (U.K.)

Formatted: English (U.K.)

There was a clear relationship between the educational requirements of the job and the chance of  
returning to work after stroke. Professionals had a significantly better prognosis than technicians  
and associate professionals who in turn had a significantly better prognosis than workers in



1  
2  
3 occupations that only require skills at a basic level. The latter group had a significantly better  
4 prognosis than workers employed in elementary occupations, where no education is required.  
5  
6  
7

8  
9 Odds ratios for gainful occupation during the second calendar year after stroke are given in Table 1.

10  
11 Table 2 gives the social group distribution of the post-stroke patients by time passed since onset of  
12 illness. [The category 'gainfully occupied' includes self-employed people, assisting spouses and](#)  
13 [employees. From Table 2, the percentages in these categories are 5.3, 0.2 and 58.8 respectively. The](#)  
14 [sum of these percentages is not 62.1% but 64.3%. The reason for the discrepancy is that table 2 only](#)  
15 [includes people in the age bracket 20-54 years while the main analysis includes people in the age](#)  
16 [bracket 20 – 57 years.](#)  
17  
18  
19  
20  
21  
22  
23  
24  
25  
26  
27  
28  
29  
30  
31  
32  
33  
34  
35  
36  
37  
38  
39  
40  
41  
42  
43  
44  
45  
46  
47  
48  
49  
50  
51  
52  
53  
54  
55  
56  
57  
58  
59  
60

**Table 1.** Odds ratios (OR), with 95% confidence interval (CI) for return to gainful occupation two year after stroke

| Parameter          | Level                                                              | N     | Returns | OR   | 95% CI    |
|--------------------|--------------------------------------------------------------------|-------|---------|------|-----------|
| Gender             | Men                                                                | 12114 | 7698    | 1.00 | -         |
|                    | Women                                                              | 7789  | 4677    | 0.79 | 0.74-0.84 |
| Age                | < 50 years                                                         | 9930  | 6608    | 1.00 | -         |
|                    | 50 - 57 years                                                      | 9973  | 5767    | 0.61 | 0.57-0.65 |
| Diagnosis          | Subarachnoid <a href="#">haemorrhage</a>                           | 3449  | 2070    | 0.79 | 0.71-0.88 |
|                    | Intracerebral <a href="#">haemorrhage</a>                          | 2272  | 976     | 0.39 | 0.35-0.43 |
|                    | Cerebral infarction                                                | 5952  | 3820    | 1.00 | -         |
|                    | Stroke, not specified as <a href="#">haemorrhage</a> or infarction | 8230  | 5509    | 1.14 | 1.06-1.23 |
| Self-employment    | No                                                                 | 17916 | 11180   | 1.00 | -         |
|                    | Yes                                                                | 1987  | 1195    | 0.87 | 0.78-0.96 |
| Occupational class | Legislators, senior officials and managers                         | 1231  | 822     | 2.31 | 2.00-2.68 |
|                    | Professionals                                                      | 2190  | 1624    | 3.04 | 2.70-3.43 |
|                    | Technicians and associate professionals                            | 2980  | 2084    | 2.33 | 2.05-2.65 |
|                    | Workers in occupations that require skills at a basic level        | 9129  | 5478    | 1.50 | 1.38-1.64 |
|                    | Workers in elementary occupations                                  | 2475  | 1254    | 1.00 | -         |
|                    | Gainfully occupied people NOS                                      | 1898  | 1113    | 1.28 | 1.15-1.43 |
| Municipality type  | Municipality without brain injury centre                           | 15861 | 9908    | 1.00 | -         |
|                    | Municipality with brain injury centre                              | 4042  | 2467    | 0.91 | 0.78-1.06 |

Deleted: hemorrhage

Formatted: English (U.K.)

Deleted: hemorrhage

Formatted: English (U.K.)

Deleted: hemorrhage

Formatted: English (U.K.)

**Table 2.** Social group distribution (%) by time passed since onset of illness, among stroke patients in Denmark 1996-2006 who were 20-54 year of age and gainfully occupied at the time of the stroke

| Social status                         | Year after stroke |       |       |       |       |
|---------------------------------------|-------------------|-------|-------|-------|-------|
|                                       | 1                 | 2     | 3     | 4     | 5     |
| Self-employed people                  | 6.1               | 5.3   | 4.9   | 4.7   | 4.7   |
| Assisting spouses                     | 0.3               | 0.2   | 0.2   | 0.2   | 0.2   |
| Employees                             | 64.9              | 58.8  | 55.7  | 53.6  | 51.4  |
| People on unemployment benefits       | 1.9               | 2.3   | 2.1   | 2.3   | 2.3   |
| People in training/education          | 0.4               | 0.4   | 0.4   | 0.2   | 0.2   |
| <a href="#">Disability pensioners</a> | 8.9               | 16.2  | 19.7  | 21.6  | 23.2  |
| Other not economically active         | 7.9               | 6.4   | 5.5   | 4.7   | 4.2   |
| Deceased                              | 9.5               | 10.4  | 11.6  | 12.7  | 14.0  |
| Total                                 | 100.0             | 100.0 | 100.0 | 100.0 | 100.0 |

Deleted: P

## DISCUSSION

In the present study we have shown to what extent the odds for return to work after stroke depend on age, gender, occupational status, self-employment and type of stroke, and due to the size of the study we have done so with an extraordinary precision. The study did not require the participants to

1  
2  
3 fill in a questionnaire; it was based solely on national registers. Recall bias and non-response bias  
4 were thereby eliminated. We also eliminated sampling bias by including the entire target  
5 population. Since the studied diagnoses require hospital treatment, referral bias should be minimal.  
6  
7 Bias due to emigration should also be negligible since only 0.4% of the subjects emigrated during  
8 the ca. two-year follow-up period. The study is, moreover, free from hindsight bias; the statistical  
9 model was completely specified and a study protocol was published [<sup>19</sup>] before we looked at any  
10 relation between the exposure and response variables in our data material.  
11  
12  
13  
14  
15  
16

17  
18 We had calendar day specific information on deaths, migrations and [hospitalisations](#) but, since the  
19 occupational data only were given per calendar year, we did not have exact dates of return to work.  
20  
21

Deleted: hospitalizations

Formatted: English (U.K.)

22 Moreover, only the main occupation and social group during a calendar year is recorded in the  
23 register. A person could, in other words, return to work in a given calendar year and still be counted  
24 as a non-returner if he, for example, was sickness absent or unemployed during the major part of  
25 that year. Another consequence of not having a calendar day specific occupational history was that  
26 we had to resort to logistic regression instead of time-to-event analysis, which is regarded as the  
27 choice method in [modelling](#) return to work.<sup>[5]</sup> [Since RTW is not a rare event, the odds ratio can not](#)  
28 [be used as a proxy for the rate ratio, which makes it difficult to compare the effects obtained in the](#)  
29 [present study with those obtained in studies that uses time-to-event analysis.](#) That the participants  
30 had to return to a quite stable gainful occupation before they were categorized as having returned to  
31 work can, however, also be regarded as a strength. [Studies show that many people with brain injury](#)  
32 return to work too soon and subsequently find that they are unable to continue their employment.<sup>[1]</sup>  
33  
34  
35  
36  
37  
38  
39  
40  
41  
42  
43  
44  
45  
46  
47  
48  
49  
50  
51  
52  
53  
54  
55  
56  
57  
58  
59  
60

Deleted: modeling

Formatted: English (U.K.)

Deleted: M

[Table 2 suggests that this is the case also for some of the people in the present study.](#)

1  
2  
3 In the present study we showed that people whose stroke was due to intracerebral [haemorrhage](#), on  
4  
5 average, had a worse prognosis than those with an intracerebral infarction. This finding is in  
6  
7 agreement with previous research, which indicates that people with a stroke caused by [haemorrhage](#)  
8  
9 tend to have more severe impairments at admission compared with those whose stroke is caused by  
10  
11 an infarction.[20-22] Stroke types, as given by the ICD-10 codes are, however, quite crude proxies  
12  
13 for stroke severity; it is obvious that a person with a miniscule intracerebral [haemorrhage](#) might  
14  
15 have a far better prognosis than someone with a massive cerebral infarction. In a prospective study  
16  
17 on 1000 unselected stroke patients in Denmark,[20] stroke severity was the all important prognostic  
18  
19 factor; stroke type had no influence on neurologic outcome when stroke severity was controlled for.  
20  
21 Overall stroke severity is also the most consistent predictive factor for RTW.[18] The major  
22  
23 weakness of the present register study is that it lacks a direct severity measure, such as the  
24  
25 American Heart Association Stroke Outcome Classification,[23] the modified Rankin scale [24] or  
26  
27 the Barthel ADL Index.[25] Our chances of correctly estimating whether or not an individual  
28  
29 patient would return to work would have been considerably enhanced by such measures. The results  
30  
31 of the present study are therefore more useful when viewed from a public health perspective than  
32  
33 they are from a clinical perspective. At the group level, the results can be used to estimate the  
34  
35 proportion of patients that is expected to return to work. The study thereby provides a comparison  
36  
37 material, which can be used by, for example, hospitals or municipalities to evaluate return to work  
38  
39 programs.

Deleted: hemorrhage

Formatted: English (U.K.)

Deleted: hemorrhage

Formatted: English (U.K.)

Deleted: hemorrhage

Formatted: English (U.K.)

40  
41 The prognosis among people with the ICD-10 code I64 (stroke, not specified as [haemorrhage](#) or  
42  
43 infarction) is somewhat paradoxical. Stroke that is caused by either [haemorrhage](#) or infarction  
44  
45 should not be associated with a better prognosis than both stroke specified as [haemorrhage](#) and  
46  
47 stroke specified as infarction. The elevated odds for returning to work in this ill-defined patient  
48  
49  
50  
51  
52  
53  
54  
55  
56  
57  
58  
59  
60

Deleted: hemorrhage

Formatted: English (U.K.)

Deleted: hemorrhage

Formatted: English (U.K.)

Deleted: hemorrhage

Formatted: English (U.K.)

1  
2  
3 group suggest that many of the people who were given the diagnosis I64 did not have a stroke in the  
4  
5 first place.  
6  
7

8  
9 The fact that men had a better chance of returning to work than women and the large difference  
10  
11 between them is another paradoxical finding. Previous research does not indicate that female stroke  
12  
13 patients have a worse functional recovery than the male patients.[26;27] It has, moreover, been  
14  
15 shown that age-specific life expectancy after stroke is far better among women than men.[28] It is  
16  
17 therefore reasonable to believe that at least a part of the gender difference observed in the present  
18  
19 study is due to cultural rather than physiologic factors. For example, in many cultures, a part of the  
20  
21 male identity is to be responsible for providing for the household (being the breadwinner). In such  
22  
23 cultures, a man who returns to work would not only regain his employment and stable income but  
24  
25 also his male identity.[29] Although Denmark is considered a modern country where men and  
26  
27 women in many respects are treated as equals, attitudes and [behaviour](#) might still be influenced by  
28  
29 [the more traditional gender roles with regard to being a provider versus allowing oneself to be](#)  
30  
31 provided for. It is possible that these ancient gender roles influenced not only the patient but also  
32  
33 the municipality official who is to decide whether or not a person qualifies for sickness benefit,  
34  
35 disability pension, or vocational rehabilitation. [Since stress is believed to be an important risk factor](#)  
36  
37 for stroke,[30] it is also possible that a part of the observed gender difference in RTW rates was due  
38  
39 to a higher health and safety awareness and a lower propensity to take risks among women[31;32]

Deleted: behavior

Formatted: English (U.K.)

Formatted: Font: 12 pt, English (U.K.)

Formatted: English (U.K.)

40  
41 Previous research on the relationship between occupational class and return to work after stroke was  
42  
43 performed on patient samples that were too small to subdivide further than into white versus blue-  
44  
45 collar workers. The observed white versus blue-collar odds-ratios for return to work were 4.72  
46  
47 (USA, 1968-73), 1.19 (USA, 1980's), 1.43 (Japan, 1986-90) and 2.99 (Sweden, 1990's).[<sup>2;6;8;33</sup>] In  
48  
49  
50  
51  
52  
53  
54  
55  
56  
57  
58  
59  
60

1  
2  
3 the present study, we have shown that it is not only the physical requirements of the work (manual  
4 versus non-manual) that matters but that inequalities also exist between occupational classes within  
5 the blue and white-collar categories. Although stroke is highly associated with cognitive  
6 impairments,[34] we found that the probability of returning to work increased with the educational  
7 requirements of the job. This may sound counter intuitive at first. The investigated socio-  
8 occupational classes differ, however, not only in cognitive demands but also in respect to other  
9 psychosocial factors. There is, for example, a positive relationship between the educational  
10 requirements of the job and the possibilities to influence the volume as well as the content of ones  
11 work [35] and this is a factor which can play an important role in the return to work process.[1]  
12 Educational requirements are also positively correlated with 'meaning of work'.[35]  
13  
14  
15  
16  
17  
18  
19  
20  
21  
22

23  
24 Patients in municipalities with a brain injury rehabilitation centre did not have a better prognosis  
25 than patients in other municipalities. This null-finding might be due to factors that have nothing to  
26 do with the centres. As only a minority of the patients is treated at a brain rehabilitation centre, our  
27 study can not determine the effectiveness of the centres. It stresses, however, the importance of  
28 testing the workability of the centres in a randomized controlled trial before it is decided whether or  
29 not they should be recommended as an efficient RTW strategy.  
30  
31  
32  
33  
34  
35  
36  
37

38 [It should finally be noted that the present study gives the situation in the Danish population and that](#)  
39 [the Danish system, where the eligibility for sickness benefit, vocational training and disability](#)  
40 [pension is determined by a municipal official, differ from that in many other countries where this is](#)  
41 [determined by a medical practitioner.](#)  
42  
43  
44  
45  
46  
47  
48  
49  
50  
51  
52  
53  
54  
55  
56  
57  
58  
59  
60

1  
2  
3 In conclusion, RTW strategies for post-stroke patients ought to focus especially on the inequalities  
4 between the genders and socioeconomic groups. Further research is needed to explain the gender  
5 inequality, which suggests either a potential to improve return-to-work rates among the females or a  
6  
7 tendency among the males to return too early.  
8  
9

Formatted: English (U.K.)

10  
11  
12 **ACKNOWLEDGEMENTS**

13  
14 Sannie Vester Thorsen, Kathrine Carlsen, Mogens Haulund Andersen, Trine Lehmann Lund and Jakob  
15  
16 Bue Bjørner at the National Research Centre for the Working Environment (NRCWE) are thanked for  
17  
18 valuable discussions. Elizabeth Bengtsen and Rikke Nilsson, NRCWE, are thanked for their assistance  
19  
20 in the obtainment of references.  
21  
22

23  
24 **FUNDING SOURCES**

25  
26 The study was funded by The Danish National Labour Market Authority, grant number 2008-5231.  
27  
28  
29

30 **DISCLOSURES**

31  
32 Frank Humle, one of the authors, is Director of the Centre for Rehabilitation of Brain Injury (CRBI)  
33  
34 in Copenhagen, Denmark. CRBI is a self-owned fund which is financially supported by grants from  
35  
36 the Danish municipalities and, to a lesser degree, by a collectively bargained framework agreement  
37  
38 under the Danish Health Law that covers 20% of the funds' operation costs. Since the study could  
39  
40 tell us whether or not stroke patients in municipalities with brain injury rehabilitation centres have a  
41  
42 better prognosis than those in other municipalities, there was a potential conflict of interest. We  
43  
44 believe, however, that any potential bias due to competing interests was eliminated by the  
45  
46 publication of our detailed study protocol,[19] which implied a commitment to adhere to the  
47  
48 methods chosen and to publish the results regardless of the outcome.  
49  
50  
51  
52  
53  
54  
55  
56  
57  
58  
59  
60

## Reference List

- 1  
2  
3  
4  
5  
6 (1) Wolfenden B, Grace M. Returning to work after stroke: a review. *Int J Rehabil Res*  
7 2009;32:93-97.
- 8  
9 (2) Vestling M, Tufvesson B, Iwarsson S. Indicators for return to work after stroke and the  
10 importance of work for subjective well-being and life satisfaction. *J Rehabil Med*  
11 2003;35:127-131.
- 12  
13 (3) Shames J, Treger I, Ring H, Giaquinto S. Return to work following traumatic brain injury:  
14 trends and challenges. *Disabil Rehabil* 2007;29:1387-1395.
- 15  
16 (4) Di CA. Human and economic burden of stroke. *Age Ageing* 2009;38:4-5.
- 17  
18 (5) Daniel K, Wolfe CD, Busch MA, McKeivitt C. What are the social consequences of stroke  
19 for working-aged adults? A systematic review. *Stroke* 2009;40:e431-e440.
- 20  
21 (6) Saeki S, Ogata H, Okubo T, Takahashi K, Hoshuyama T. Return to work after stroke. A  
22 follow-up study. *Stroke* 1995;26:399-401.
- 23  
24 (7) Glozier N, Hackett ML, Parag V, Anderson CS. The influence of psychiatric morbidity on  
25 return to paid work after stroke in younger adults: the Auckland Regional Community  
26 Stroke (ARCOS) Study, 2002 to 2003. *Stroke* 2008;39:1526-1532.
- 27  
28 (8) Wozniak MA, Kittner SJ, Price TR, Hebel JR, Sloan MA, Gardner JF. Stroke location is not  
29 associated with return to work after first ischemic stroke. *Stroke* 1999;30:2568-2573.
- 30  
31 (9) Soll-Johanning H, Hannerz H, Tuchsien F. Referral bias in hospital register studies of  
32 geographical and industrial differences in health. *Dan Med Bull* 2004;51:207-210.
- 33  
34 (10) *Statistics Denmark. DISCO-88 statistics Denmark's standard classification of occupations.*  
35 Copenhagen: Statistics Denmark, 1996.
- 36  
37 (11) *Statistics Denmark. SOCIO Danmarks Statistiks Socioøkonomiske Klassifikation.* 1st ed.  
38 Copenhagen: Statistics Denmark, 1997.
- 39  
40 (12) Nickelsen TN. [Data validity and coverage in the Danish National Health Registry. A  
41 literature review]. *Ugeskr Laeger* 2001;164:33-37.
- 42  
43 (13) Keese M. *Live longer, work longer. Aging and employment policies.* Paris: OECD  
44 publications, 2006.
- 45  
46 (14) Immonen-Raiha P, Mahonen M, Tuomilehto J et al. Trends in case-fatality of stroke in  
47 Finland during 1983 to 1992. *Stroke* 1997;28:2493-2499.
- 48  
49 (15) Pajunen P, Paakkonen R, Hamalainen H et al. Trends in fatal and nonfatal strokes among  
50 persons aged 35 to > or =85 years during 1991-2002 in Finland. *Stroke* 2005;36:244-248.
- 51  
52  
53  
54  
55  
56  
57  
58  
59  
60



- 1  
2  
3 (16) Roberts SE, Goldacre MJ. Case fatality rates after admission to hospital with stroke: linked  
4 database study. *BMJ* 2003;326:193-194.  
5  
6 (17) Johansen K, Andersen JS, Mikkelsen S, Pass O, Raffnsøe S, Lynge E. Controlling sickness  
7 absence: a study of changes in the Danish sickness absence legislation since 1973. *Health*  
8 *Policy* 2008;86:109-118.  
9  
10 (18) Treger I, Shames J, Giaquinto S, Ring H. Return to work in stroke patients. *Disabil Rehabil*  
11 2007;29:1397-1403.  
12  
13 (19) Hannerz H, Pedersen BH, Poulsen OM, Humle F, Andersen LL. Study protocol to a  
14 nationwide prospective cohort study on return to gainful occupation after stroke in Denmark  
15 1. *BMC Public Health* 2010;10:623.  
16  
17 (20) Jorgensen HS, Nakayama H, Raaschou HO, Olsen TS. Intracerebral hemorrhage versus  
18 infarction: stroke severity, risk factors, and prognosis. *Ann Neurol* 1995;38:45-50.  
19  
20 (21) Kelly PJ, Furie KL, Shafiqat S, Rallis N, Chang Y, Stein J. Functional recovery following  
21 rehabilitation after hemorrhagic and ischemic stroke. *Arch Phys Med Rehabil* 2003;84:968-  
22 972.  
23  
24 (22) Katrak PH, Black D, Peeva V. Do stroke patients with intracerebral hemorrhage have a  
25 better functional outcome than patients with cerebral infarction? *PM R* 2009;1:427-433.  
26  
27 (23) Kelly-Hayes M, Robertson JT, Broderick JP et al. The American Heart Association Stroke  
28 Outcome Classification. *Stroke* 1998;29:1274-1280.  
29  
30 (24) van Swieten JC, Koudstaal PJ, Visser MC, Schouten HJ, van GJ. Interobserver agreement  
31 for the assessment of handicap in stroke patients. *Stroke* 1988;19:604-607.  
32  
33 (25) Collin C, Wade DT, Davies S, Horne V. The Barthel ADL Index: a reliability study. *Int*  
34 *Disabil Stud* 1988;10:61-63.  
35  
36 (26) Wade DT, Hewer RL, Wood VA. Stroke: influence of patient's sex and side of weakness on  
37 outcome. *Arch Phys Med Rehabil* 1984;65:513-516.  
38  
39 (27) Bonita R, Beaglehole R. Recovery of motor function after stroke. *Stroke* 1988;19:1497-  
40 1500.  
41  
42 (28) Hannerz H, Nielsen ML. Life expectancies among survivors of acute cerebrovascular  
43 disease. *Stroke* 2001;32:1739-1744.  
44  
45 (29) Bouta T, Frekrs G, Bannon I. *Gender, Conflict and Development*. Washington DC: World  
46 Bank Publications, 2004.  
47  
48 (30) Truelsen T, Nielsen N, Boysen G, Gronbaek M. Self-reported stress and risk of stroke: the  
49 Copenhagen City Heart Study. *Stroke* 2003;34:856-862.  
50  
51 (31) Powell M, Ansic D. Gender Difference in Risk Behaviour in Financial Decision-Making:  
52 An Experimental Analysis. *J Econ Psychol* 1997;18:605-628.  
53  
54  
55  
56  
57  
58  
59  
60

- 1  
2  
3 (32) Wilson M, Daly M, Gordon S, Pratt A. Sex differences in valuations of the environment?  
4 *Population & Environment* 1996;18:143-159.  
5  
6 (33) Howard G, Till JS, Toole JF, Matthews C, Truscott BL. Factors influencing return to work  
7 following cerebral infarction. *JAMA* 1985;253:226-232.  
8  
9 (34) Hoffmann M. Higher cortical function deficits after stroke: an analysis of 1,000 patients  
10 from a dedicated cognitive stroke registry. *Neurorehabil Neural Repair* 2001;15:113-127.  
11  
12 (35) Moncada S, Pejtersen JH, Navarro A et al. Psychosocial work environment and its  
13 association with socioeconomic status. A comparison of Spain and Denmark. *Scand J Public*  
14 *Health* 2010;38:137-148.  
15  
16  
17  
18  
19  
20  
21  
22  
23  
24  
25  
26  
27  
28  
29  
30  
31  
32  
33  
34  
35  
36  
37  
38  
39  
40  
41  
42  
43  
44  
45  
46  
47  
48  
49  
50  
51  
52  
53  
54  
55  
56  
57  
58  
59  
60

For peer review only

1 STROBE Statement—Checklist of items that should be included in reports of *cohort studies*

|                              | Item No | Recommendation                                                                                                                                                                                                                                                                                                                                                                                                |
|------------------------------|---------|---------------------------------------------------------------------------------------------------------------------------------------------------------------------------------------------------------------------------------------------------------------------------------------------------------------------------------------------------------------------------------------------------------------|
| <b>Title and abstract</b>    | 1       | (a) Indicate the study's design with a commonly used term in the title or the abstract<br>(b) Provide in the abstract an informative and balanced summary of what was done and what was found                                                                                                                                                                                                                 |
| <b>Introduction</b>          |         |                                                                                                                                                                                                                                                                                                                                                                                                               |
| Background/rationale         | 2       | Explain the scientific background and rationale for the investigation being reported                                                                                                                                                                                                                                                                                                                          |
| Objectives                   | 3       | State specific objectives, including any prespecified hypotheses                                                                                                                                                                                                                                                                                                                                              |
| <b>Methods</b>               |         |                                                                                                                                                                                                                                                                                                                                                                                                               |
| Study design                 | 4       | Present key elements of study design early in the paper                                                                                                                                                                                                                                                                                                                                                       |
| Setting                      | 5       | Describe the setting, locations, and relevant dates, including periods of recruitment, exposure, follow-up, and data collection                                                                                                                                                                                                                                                                               |
| Participants                 | 6       | (a) Give the eligibility criteria, and the sources and methods of selection of participants. Describe methods of follow-up<br>(b) For matched studies, give matching criteria and number of exposed and unexposed                                                                                                                                                                                             |
| Variables                    | 7       | Clearly define all outcomes, exposures, predictors, potential confounders, and effect modifiers. Give diagnostic criteria, if applicable                                                                                                                                                                                                                                                                      |
| Data sources/<br>measurement | 8*      | For each variable of interest, give sources of data and details of methods of assessment (measurement). Describe comparability of assessment methods if there is more than one group                                                                                                                                                                                                                          |
| Bias                         | 9       | Describe any efforts to address potential sources of bias                                                                                                                                                                                                                                                                                                                                                     |
| Study size                   | 10      | Explain how the study size was arrived at                                                                                                                                                                                                                                                                                                                                                                     |
| Quantitative variables       | 11      | Explain how quantitative variables were handled in the analyses. If applicable, describe which groupings were chosen and why                                                                                                                                                                                                                                                                                  |
| Statistical methods          | 12      | (a) Describe all statistical methods, including those used to control for confounding<br>(b) Describe any methods used to examine subgroups and interactions<br>(c) Explain how missing data were addressed<br>(d) If applicable, explain how loss to follow-up was addressed<br>(e) Describe any sensitivity analyses                                                                                        |
| <b>Results</b>               |         |                                                                                                                                                                                                                                                                                                                                                                                                               |
| Participants                 | 13*     | (a) Report numbers of individuals at each stage of study—eg numbers potentially eligible, examined for eligibility, confirmed eligible, included in the study, completing follow-up, and analysed<br>(b) Give reasons for non-participation at each stage<br>(c) Consider use of a flow diagram                                                                                                               |
| Descriptive data             | 14*     | (a) Give characteristics of study participants (eg demographic, clinical, social) and information on exposures and potential confounders<br>(b) Indicate number of participants with missing data for each variable of interest<br>(c) Summarise follow-up time (eg, average and total amount)                                                                                                                |
| Outcome data                 | 15*     | Report numbers of outcome events or summary measures over time                                                                                                                                                                                                                                                                                                                                                |
| Main results                 | 16      | (a) Give unadjusted estimates and, if applicable, confounder-adjusted estimates and their precision (eg, 95% confidence interval). Make clear which confounders were adjusted for and why they were included<br>(b) Report category boundaries when continuous variables were categorized<br>(c) If relevant, consider translating estimates of relative risk into absolute risk for a meaningful time period |

|                          |    |                                                                                                                                                                            |
|--------------------------|----|----------------------------------------------------------------------------------------------------------------------------------------------------------------------------|
| Other analyses           | 17 | Report other analyses done—eg analyses of subgroups and interactions, and sensitivity analyses                                                                             |
| <b>Discussion</b>        |    |                                                                                                                                                                            |
| Key results              | 18 | Summarise key results with reference to study objectives                                                                                                                   |
| Limitations              | 19 | Discuss limitations of the study, taking into account sources of potential bias or imprecision. Discuss both direction and magnitude of any potential bias                 |
| Interpretation           | 20 | Give a cautious overall interpretation of results considering objectives, limitations, multiplicity of analyses, results from similar studies, and other relevant evidence |
| Generalisability         | 21 | Discuss the generalisability (external validity) of the study results                                                                                                      |
| <b>Other information</b> |    |                                                                                                                                                                            |
| Funding                  | 22 | Give the source of funding and the role of the funders for the present study and, if applicable, for the original study on which the present article is based              |

\*Give information separately for exposed and unexposed groups.

**Note:** An Explanation and Elaboration article discusses each checklist item and gives methodological background and published examples of transparent reporting. The STROBE checklist is best used in conjunction with this article (freely available on the Web sites of PLoS Medicine at <http://www.plosmedicine.org/>, Annals of Internal Medicine at <http://www.annals.org/>, and Epidemiology at <http://www.epidem.com/>). Information on the STROBE Initiative is available at <http://www.strobe-statement.org>.
